# Supplementary material
Source: PubMed Central journal article supplement (PMC5033952)
Supplement: jciinsight-1-87065-s001.pdf [file jciinsight-1-87065-s001.pdf]

## Supplemental Table

### List of consortium and affiliations

| No. | Name                         | E-mail                            | Affiliation                                                                                                                                                                                      |
|-----|------------------------------|-----------------------------------|--------------------------------------------------------------------------------------------------------------------------------------------------------------------------------------------------|
| 1.  | Praphan Phanuphak, MD., PhD. | praphan.p@trcarc.org              | <b>The Thai Red Cross AIDS Research Centre</b><br>104 Ratchadamri Road, Pathumwan, Bangkok, Thailand 10330<br>Telephone: +662 256 4107<br>Fax +662 254 7577                                      |
| 2.  | Nipat Teeratakulpisarn, MD.  | nipat.t@trcarc.org                | <b>The Thai Red Cross AIDS Research Centre</b><br>104 Ratchadamri Road, Pathumwan, Bangkok, Thailand 10330<br>Telephone: +662 256 4107<br>Fax +662 254 7577                                      |
| 3.  | Eugene Kroon, MD.            | eugene.k@searchthailand.org       | <b>SEARCH, Thailand</b><br>Tower 2, 2nd floor Rajdumri Road Pathumwan Bangkok 10330 Thailand<br>Telephone : +662-254-2566, 662-254-2568, 662-254-2569<br>Fax : +662-254-2567                     |
| 4.  | Donn Colby, MD.              | donn.c@searchthailand.org         | <b>SEARCH, Thailand</b><br>Tower 2, 2nd floor Rajdumri Road Pathumwan Bangkok 10330 Thailand<br>Tel : +662-254-2566, 662-254-2568, 662-254-2569<br>Fax : +662-254-2567                           |
| 5.  | Duanghathai Suttichom        | duanghathai.s@searchthailand.org  | <b>SEARCH, Thailand</b><br>Tower 2, 2nd floor Rajdumri Road Pathumwan Bangkok 10330 Thailand<br>Telephone: +662-254-2566, 662-254-2568, 662-254-2569<br>Fax : +662-254-2567                      |
| 6.  | Somprarthana Rattanamanee    | somprarthana.r@searchthailand.org | <b>SEARCH, Thailand</b><br>Tower 2, 2nd floor Rajdumri Road Pathumwan Bangkok 10330 Thailand<br>Telephone : +662-254-2566, 662-254-2568, 662-254-2569<br>Fax : +662-254-2567                     |
| 7.  | Peeriya Prueksakaew          | peeriya.p@searchthailand.org      | <b>SEARCH, Thailand</b><br>Tower 2, 2nd floor Rajdumri Road Pathumwan Bangkok 10330 Thailand<br>Telephone: +662-254-2566, 662-254-2568, 662-254-2569<br>Fax : +662-254-2567                      |
| 8.  | Somporn Tipsuk               | somporn.t@searchthailand.org      | <b>SEARCH, Thailand</b><br>Tower 2, 2nd floor Rajdumri Road Pathumwan Bangkok 10330 Thailand<br>Telephone : +662-254-2566, 662-254-2568, 662-254-2569<br>Fax : +662-254-2567                     |
| 9.  | Putthachard Karnsomlap       | putthachard.k@searchthailand.org  | <b>SEARCH, Thailand</b><br>Tower 2, 2nd floor Rajdumri Road Pathumwan Bangkok 10330 Thailand<br>Tel : +662-254-2566, 662-254-2568, 662-254-2569<br>Fax : +662-254-2567                           |
| 10. | Sasiwimol Ubolyam            | sasiwimol.u@hivnat.org            | <b>The HIV Netherlands Australia Thailand Research Collaboration (HIV-NAT)</b><br>104 Ratchadamri Road, Pathumwan, Bangkok 10330, Thailand<br>Telephone: +(662) 652 3040<br>Fax: +(662) 254 7574 |
| 11. | Pacharin Eamyong.            | pacharin.e@hivnat.org             | <b>The HIV Netherlands Australia Thailand Research Collaboration (HIV-NAT)</b><br>104 Ratchadamri Road, Pathumwan, Bangkok, 10330, Thailand<br>Telephone: +(662) 652 3040                        |

| No. | Name                            | E-mail                | Affiliation                                                                                                                                                                                           |
|-----|---------------------------------|-----------------------|-------------------------------------------------------------------------------------------------------------------------------------------------------------------------------------------------------|
|     |                                 |                       | Fax: +(662) 254 7574                                                                                                                                                                                  |
| 12. | Robert O'Connell, MD.,<br>FACP. | oconnellrj@hiv-th.org | <b>Armed Forces Institute for Medical Sciences</b><br>U.S. Army Medical Component<br>315/6 Rajvithi Road, Bangkok, 10400, Thailand<br>Telephone : +662 644-4888, +662-696-2700<br>Fax : +662 354-7873 |
| 13. | Yuwadee Phuang-Ngren,           | yuwadee.p@hiv-th.org  | <b>Armed Forces Institute for Medical Sciences</b><br>U.S. Army Medical Component<br>315/6 Rajvithi Road, Bangkok, 10400, Thailand<br>Telephone : +662 644-4888, +662-696-2700<br>Fax : +662 354-7873 |
| 14. | Chayada Sajjawerawan            | chayadas@hiv-th.org   | <b>Armed Forces Institute for Medical Sciences</b><br>U.S. Army Medical Component<br>315/6 Rajvithi Road, Bangkok, 10400, Thailand<br>Telephone : +662 644-4888, +662-696-2700<br>Fax : +662 354-7873 |
| 15. | Rapee Trichavaroj               | rapeet@hiv-th.org     | <b>Armed Forces Institute for Medical Sciences</b><br>U.S. Army Medical Component<br>315/6 Rajvithi Road, Bangkok, 10400, Thailand<br>Telephone : +662 644-4888, +662-696-2700<br>Fax : +662 354-7873 |
| 16. | Nantana Tantibul,               | nantanat@hiv-th.org   | <b>Armed Forces Institute for Medical Sciences</b><br>U.S. Army Medical Component<br>315/6 Rajvithi Road, Bangkok, 10400, Thailand<br>Telephone : +662 644-4888, +662-696-2700<br>Fax : +662 354-7873 |
| 17. | Siriwat Akapirat,               | siriwata@hiv-th.org   | <b>Armed Forces Institute for Medical Sciences</b><br>U.S. Army Medical Component<br>315/6 Rajvithi Road, Bangkok, 10400, Thailand<br>Telephone : +662 644-4888, +662-696-2700<br>Fax : +662 354-7873 |
| 18. | Surat Jongrakthaitae            | suratj@hiv-th.org     | <b>Armed Forces Institute for Medical Sciences</b><br>U.S. Army Medical Component<br>315/6 Rajvithi Road, Bangkok, 10400, Thailand<br>Telephone : +662 644-4888, +662-696-2700 Fax :<br>+662 354-7873 |
